# Supplementary material
Source: bioRxiv or medRxiv preprint supplement (https://www.biorxiv.org/highwire/filestream/1717/field_highwire_adjunct_files/14/006932-4.pdf)

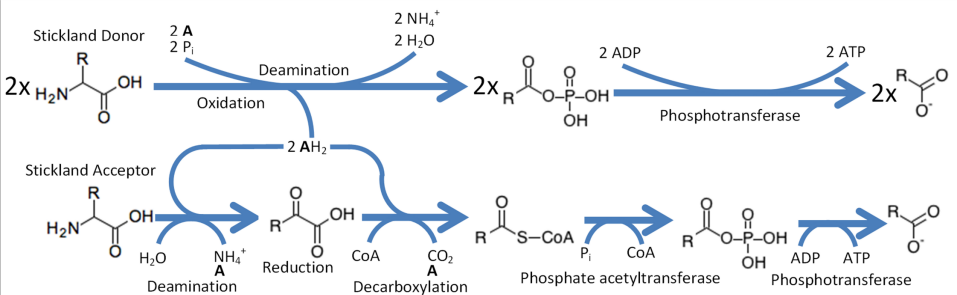

Supplement: Supplementary file [file 006932-4.pdf]
